# Supplementary material for: Heterosis in COMT Val158Met Polymorphism Contributes to Sex-Differences in Children’s Math Anxiety
Source: PubMed Central journal article supplement (PMC6530072; doi:10.3389/fpsyg.2019.01013), 2019-05-15
Supplement: Table_1.pdf [file Table_1.pdf]

Table 1: Studies investigating the association between the Val158Met *COMT* polymorphism and anxiety in children and adolescents

| Study                | Age in years (sample size) | Study design                          | Genotype groups                                    | Anxiety Measures                                                                                                                                   | Statistical analysis<br>Between groups' difference (effect size, ES)                                                                                                                             | Sex differences                    | Genotype by stress interaction                                            |
|----------------------|----------------------------|---------------------------------------|----------------------------------------------------|----------------------------------------------------------------------------------------------------------------------------------------------------|--------------------------------------------------------------------------------------------------------------------------------------------------------------------------------------------------|------------------------------------|---------------------------------------------------------------------------|
| Arbelle et al., 2003 | 7-8 (n=98)                 | Cross-sectional                       | Val/Val, Val/Met, Met/Met                          | Schedule for Affective Disorders and Schizophrenia for School-Age Children, Martin Temperament Assessment Battery and Achenbach Behavior Checklist | Univariate ANOVA<br>Non significant<br>$\eta^2 = 0.20$                                                                                                                                           | Not investigated                   | Not investigated                                                          |
| Olsson et al., 2005  | 14 and 24 (n=962)          | Longitudinal<br>2 measures (10 years) | Val/Val, Val/Met, Met/Met                          | Clinical Interview Schedule-Revised (CIS-R)                                                                                                        | Logistic regression and ANOVA<br>Met/Met: higher persistent episodic anxiety<br>ES: Information not available                                                                                    | Met allele effects only in females | Not investigated                                                          |
| Olsson et al., 2007  | 14 and 24 (n=962)          | Longitudinal<br>2 measures (10 years) | Val/Val, Val/Met, Met/Met                          | Clinical Interview Schedule-Revised (CIS-R)                                                                                                        | Logistic regression<br>Double recessive interaction: twofold reduction of persistent generalized anxiety in <i>COMT</i> (Met/Met) and 5HTTLPR (S/S) individuals<br>ES: Information not available | No sex interaction                 | Genetic protection under high stress conditions positive, not significant |
| Evans et al., 2009   | 6-7 (n=8431)               | Cross-sectional                       | Met/Met, Met/ValA, Met/ValB, ValA/ValA, ValA/ValB, | Strengths and Difficulties Questionnaire (SDQ) and Life Event Questionnaire                                                                        | Logistic regression<br>Non-significant<br>ES: Information not available                                                                                                                          | No sex interaction                 | Anxiety and depression in adults; no and <i>COMT</i> genotype by          |

| ValB/ValB                     |                                |                                       |                           |                                                                                                   | stress interaction                                                                                                        |                    |                             |
|-------------------------------|--------------------------------|---------------------------------------|---------------------------|---------------------------------------------------------------------------------------------------|---------------------------------------------------------------------------------------------------------------------------|--------------------|-----------------------------|
| Gadow et al., 2009            | 4-14 (n=67)                    | cross-sectional                       | Met/-, Val/Val            | Child Symptom Inventory-4 (CSI-4)                                                                 | ANOVAs<br>marginally significant for teacher ratings of social phobia (0.06) (Met/- higher levels)<br>ES: $\eta^2 = 0.06$ | Not investigated   | Not investigated            |
| Middeldorp et al., 2010       | 7, 10, 12, 14 and 18; (n=1240) | Longitudinal<br>5 measures (11 years) | Val/Val, Val/Met, Met/Met | Child Behavior Check List (CBCL) at ages 7, 10 and 12; Youth Self Report (YSR) at 14 and 18 years | Factorial association model and path analysis<br>No effect for anxiety or depression<br>ES: Information not available     | Not investigated   | Authors did not investigate |
| Shashi et al., 2010           | 7-16 (n=40)                    | Cross-sectional                       | Val/-, Met/-              | Child Behavior Checklist (CBCL) and Computerized Diagnostic Interview for Children (C-DISC)       | Non-parametric (Mann-Whitney)<br>Val allele associated with higher frequency of anxiety disorders<br>ES: Cohen's d = 1.03 | No sex interaction | Not investigated            |
| Sheikh et al., 2013 (Study 1) | ~3.5 (n=476)                   | Cross-sectional                       | Val/Val, Met/-            | Preschool Age Psychiatric Assessment (PAPA)                                                       | Non-parametric (Mann-Whitney)<br>Val/Val children, higher levels of depressive symptoms<br>ES: Cohen's d = 0.28*          | Not investigated   | Not investigated            |

|                                  |                            |                                          |                                 |                                                                |                                                                                                                     |                                                             |                                                                                                                                          |
|----------------------------------|----------------------------|------------------------------------------|---------------------------------|----------------------------------------------------------------|---------------------------------------------------------------------------------------------------------------------|-------------------------------------------------------------|------------------------------------------------------------------------------------------------------------------------------------------|
| Sheikh et al.,<br>2013 (Study 2) | ~3.5(n=4<br>09)            | cross-<br>sectional                      | Val/Val,<br>Met/-               | Early Childhood Inventory-4<br>(ECI-4)                         | Non-parametric (Mann-<br>Whitney)<br>Val/Val children, higher<br>levels of depressive symptoms<br>Cohen's d = 0.29* | Not<br>investigated                                         | Not<br>investigated                                                                                                                      |
| Lehto et al.,<br>2013            | 15, 18 e<br>25 (n=<br>593) | longitudinal<br>3 measures<br>(10 years) | Val/Val,<br>Val/Met,<br>Met/Met | Mini-International<br>Neuropsychiatric Interview<br>(MINI 500) | Mixed linear models,<br>ANOVA or ANCOVA<br>Val/Val higher neuroticism<br>scores<br>ES: Information not available    | Val/Val<br>effects only in<br>females over<br>age 25        | Not<br>investigated                                                                                                                      |
| Sheikh et al.,<br>2017           | ~3<br>(n=409)              | cross-<br>sectional                      | Val/Val,<br>Met/-               | Child Behavior Checklist                                       | Regression-based framework<br>Val/- higher anxiety under<br>stress<br>ES: Cohen's d = 0.15*                         | Higher<br>depressive<br>and anxious<br>symptoms in<br>girls | Stress, inferred<br>from cortisol<br>levels,<br>moderated the<br>association<br>between COMT<br>Val158Met<br>polymorphism<br>and anxiety |

Note: Clinical samples were used in Gadow et al., 2009 (Autism Spectrum Disorder) and in Shashi et al., 2010 (22q11.2 deletion syndrome). Middeldorp et al., 2010 sample includes 288 monozygotyc male twins and 320 monozygotyc female twins; 382 male singletons and 392 female singletons.

## References

Arbelle S, Benjamin J, Golin M, Kremer I, Belmaker RH, Ebstein RP. Relation of shyness in grade school children to the genotype for the long form of the serotonin transporter promoter region polymorphism. *Am J Psychiatry*. 2003 Apr;160(4):671-6.

Evans J, Xu K, Heron J, Enoch MA, Araya R, Lewis G, Timpson N, Davies S, Nutt D, Goldman D. Emotional symptoms in children: The effect of maternal depression, life events, and COMT genotype. *Am J Med Genet B Neuropsychiatr Genet.* 2009 Mar 5;150B(2):209-18. doi: 10.1002/ajmg.b.30789.

Gadow KD, Roohi J, DeVincent CJ, Kirsch S, Hatchwell E. Association of COMT (Val158Met) and BDNF (Val66Met) gene polymorphisms with anxiety, ADHD and tics in children with autism spectrum disorder. *J Autism Dev Disord.* 2009 Nov;39(11):1542-51. doi: 10.1007/s10803-009-0794-4.

Lehto K, Akkermann K, Parik J, Veidebaum T, Harro J. Effect of COMT Val158Met polymorphism on personality traits and educational attainment in a longitudinal population representative study. *Eur Psychiatry.* 2013 Oct;28(8):492-8. doi: 10.1016/j.eurpsy.2013.06.008.

Middeldorp CM, Slof-Op 't Landt MC, Medland SE, van Beijsterveldt CE, Bartels M, Willemsen G, Hottenga JJ, de Geus EJ, Suchiman HE, Dolan CV, Neale MC, Slagboom PE, Boomsma DI. Anxiety and depression in children and adults: influence of serotonergic and neurotrophic genes? *Genes Brain Behav.* 2010 Oct;9(7):808-16. doi: 10.1111/j.1601-183X.2010.00619.x.

Olsson CA, Anney RJ, Lotfi-Miri M, Byrnes GB, Williamson R, Patton GC. Association between the COMT Val158Met polymorphism and propensity to anxiety in an Australian population-based longitudinal study of adolescent health. *Psychiatr Genet.* 2005 Jun;15(2):109-15.

Olsson CA, Byrnes GB, Anney RJ, Collins V, Hemphill SA, Williamson R, Patton GC. COMT Val(158)Met and 5HTTLPR functional loci interact to predict persistence of anxiety across adolescence: results from the Victorian Adolescent Health Cohort Study. *Genes Brain Behav.* 2007 Oct;6(7):647-52. Epub 2007 May 14. PubMed PMID: 17504250.

Shashi V, Howard TD, Keshavan MS, Kaczorowski J, Berry MN, Schoch K, Spence EJ, Kwapil TR. COMT and anxiety and cognition in children with chromosome 22q11.2 deletion syndrome. *Psychiatry Res.* 2010 Jul 30;178(2):433-6. doi:10.1016/j.psychres.2010.04.048.

Sheikh HI, Kryski KR, Kotelnikova Y, Hayden EP, Singh SM. Catechol-O-Methyltransferase gene (val158met) polymorphisms and anxious symptoms in early childhood: The roles of hypothalamus-pituitary-adrenal axis reactivity and life stress. *Neurosci Lett*. 2017 Oct 17;659:86-91. doi:10.1016/j.neulet.2017.08.060.

Sheikh HI, Kryski KR, Smith HJ, Dougherty LR, Klein DN, Bufferd SJ, Singh SM, Hayden EP. Catechol-O-methyltransferase gene val158met polymorphism and depressive symptoms during early childhood. *Am J Med Genet B Neuropsychiatr Genet*. 2013 Apr;162B(3):245-52. doi:10.1002/ajmg.b.32141.
